# Supplementary material
Source: MDPI journal article supplement (https://www.mdpi.com/2073-445X/11/1/21)
Supplement: s1 [file s1]

**Table S1.** The Boolean logical rules used to derive the erosion risk.

|    |          |    |      |   |       |    |          |   |           |    |        |   |                  |    |      |      |              |    |            |
|----|----------|----|------|---|-------|----|----------|---|-----------|----|--------|---|------------------|----|------|------|--------------|----|------------|
| If | Land Use | Is | High | & | Slope | Is | High     | & | Lithology | Is | High   | & | Drainage Density | Is | High | Then | Erosion Risk | Is | Very high  |
| If | Land Use | Is | High | & | Slope | Is | High     | & | Lithology | Is | Medium | & | Drainage Density | Is |      | Then | Erosion Risk | Is | High       |
| If | Land Use | Is | High | & | Slope | Is | Low      | & | Lithology | Is | High   | & | Drainage Density | Is | High | Then | Erosion Risk | Is | Medium     |
| If | Land Use | Is | High | & | Slope | Is |          | & | Lithology | Is | Medium | & | Drainage Density | Is |      | Then | Erosion Risk | Is | Low        |
| If | Land Use | Is | High | & | Slope | Is | Very low | & | Lithology | Is |        | & | Drainage Density | Is |      | Then | Erosion Risk | Is | Deposition |
| If | Land Use | Is | Low  | & | Slope | Is | Medium   | & | Lithology | Is | Medium | & | Drainage Density | Is | High | Then | Erosion Risk | Is | High       |
| If | Land Use | Is | Low  | & | Slope | Is | Medium   | & | Lithology | Is | Medium | & | Drainage Density | Is | Low  | Then | Erosion Risk | Is | Low        |
| If | Land Use | Is | Low  | & | Slope | Is | Low      | & | Lithology | Is | High   | & | Drainage Density | Is | High | Then | Erosion Risk | Is | Low        |
| If | Land Use | Is | Low  | & | Slope | Is | Very low | & | Lithology | Is | Medium | & | Drainage Density | Is |      | Then | Erosion Risk | Is | Deposition |
